# FADS2 Function Loss at the Cancer Hotspot 11q13 Locus Diverts Lipid Signaling Precursor Synthesis to Unusual Eicosanoid Fatty Acids

Woo Jung Park, Kumar S. D. Kothapalli\*, Peter Lawrence, J. Thomas Brenna\*

Division of Nutritional Sciences, Cornell University, Ithaca, New York, United States of America

## Abstract

**Background:** Genes coding for the fatty acid desaturases (FADS1, 2, 3) localized at the cancer genomic hotspot 11q13 locus are required for the biosynthesis of 20 carbon polyunsaturated fatty acids (PUFA) that are direct eicosanoid precursors. In several cancer cell lines, FADS2 encoded  $\Delta 6$  and  $\Delta 8$  desaturation is not functional.

**Methodology/Principal Findings:** Analyzing MCF7 cell fatty acids with detailed structural mass spectrometry, we show that in the absence of FADS2 activity, the FADS1 product  $\Delta 5$ -desaturase operates to produce 5,11,14–20:3 and 5,11,14,17–20:4. These PUFA are missing the 8–9 double bond of the eicosanoid signaling precursors arachidonic acid (5,8,11,14–20:4) and eicosapentaenoic acid (5,8,11,14,17–20:5). Heterologous expression of FADS2 restores  $\Delta 6$  and  $\Delta 8$ -desaturase activity and normal eicosanoid precursor synthesis.

**Conclusions/Significance:** The loss of FADS2-encoded activities in cancer cells shuts down normal PUFA biosynthesis, deleting the endogenous supply of eicosanoid and downstream docosanoid precursors, and replacing them with unusual butylene-interrupted fatty acids. If recapitulated *in vivo*, the normal eicosanoid and docosanoid cell signaling milieu would be depleted and altered due to reduction and substitution of normal substrates with unusual substrates, with unpredictable consequences for cellular communication.

**Citation:** Park WJ, Kothapalli KSD, Lawrence P, Brenna JT (2011) FADS2 Function Loss at the Cancer Hotspot 11q13 Locus Diverts Lipid Signaling Precursor Synthesis to Unusual Eicosanoid Fatty Acids. PLoS ONE 6(11): e28186. doi:10.1371/journal.pone.0028186

**Editor:** Daniel Tomé, Paris Institute of Technology for Life, Food and Environmental Sciences, France

**Received:** September 16, 2011; **Accepted:** November 2, 2011; **Published:** November 30, 2011

**Copyright:** © 2011 Park et al. This is an open-access article distributed under the terms of the Creative Commons Attribution License, which permits unrestricted use, distribution, and reproduction in any medium, provided the original author and source are credited.

**Funding:** These authors have no support or funding to report.

**Competing Interests:** The authors have declared that no competing interests exist.

\* E-mail: ksk25@cornell.edu (KSDK); jtb4@cornell.edu (JTB)

## Introduction

Several human cytogenetic and fine mapping studies have pinpointed HSA 11q13 locus as a major hotspot for a number of human cancers [1,2,3,4,5]. Numerous genetic mechanisms have been reported, including 11q13 deletions, loss of heterozygosity, translocations and allelic amplification [3,5]. The fatty acid desaturase cluster (FADS), encoded by genes *FADS1*, *FADS2*, and *FADS3*, localize within a 100 kb region on human chromosome 11q12–13.1 [6,7]. FADS2 and FADS1 encode for critical enzymes for long chain polyunsaturated fatty acid (LCPUFA) biosynthesis, introducing double bonds between specific carbon atoms. Omega-3 ( $\omega 3$  or  $n-3$ ) and omega-6 ( $\omega 6$  or  $n-6$ ) PUFA are key nutrients linked to most of the diseases of humans, specifically cardiovascular (CVD), cancer, diabetes and metabolic syndrome, and are key structural components of neural tissue [8,9]. The LCPUFA DGLA (20:3 $n-6$ ), ARA (20:4 $n-6$ ), EPA (20:5 $n-3$ ) and DHA (22:6 $n-3$ ) are precursors for cell signaling eicosanoids and their modification by biosynthetic inhibition of downstream metabolism are very valuable drug targets, for instance, cyclooxygenase and lipoxygenase inhibitors, and more recently docosanoids that are candidate drugs [10].

The FADS2 encoded  $\Delta 6$ -desaturase catalyzes the first and rate-limiting step in the biosynthesis of LCPUFA. In several cancer

cells desaturation does not occur, which may be due to inactivation of the desaturase or of upstream (e.g. CoA production) or downstream (e.g. acyl transferase) steps. The reason for this defect has been suggested to be due to extensive chromosomal deletions, but no molecular evidence is available [11,12]. The  $\Delta 8$ -desaturation substrates 20:2 $n-6$  and 20:3 $n-3$  are often detected, thus suggesting that the elongation step is functional [12,13]. Until recently, the  $\Delta 8$ -desaturation substrates 20:2 $n-6$  and 20:3 $n-3$  were widely considered dead-end products, even though they are found in human plasma and red cells as well as other tissues. We showed the first molecular evidence that FADS2 catalyzes  $\Delta 8$ -desaturation for both of these substrates, representing an alternative route to LCPUFA biosynthesis in mammals where they are converted to eicosanoid precursor LCPUFA [14]. This pathway may be available when  $\Delta 6$ -desaturase activity is compromised.

The unusual loss of PUFA desaturase activity in several cancer cells prompted us to hypothesize that the primary defect resides in the desaturase itself, and not elsewhere such as in the activation of PUFA by CoA synthesis or synthesis of phosphoglycerides as acceptors of nascent LCPUFA. We confirmed that human breast cancer MCF7 cells do not possess any capacity for biosynthesis of LCPUFA because of absence of  $\Delta 6$ -desaturase activity [12]. Here we show the restoration of this metabolic

defect by heterologous expression of FADS2, evidence of novel substrate specificity for FADS1, and competition between FADS1 and FADS2 for the same substrates, leading to the production of unusual LCPUFA which are not substrates for eicosanoid production.

## Results and Discussion

FADS2 and FADS1 transiently transfected MCF7 cells were probed for evidence of bioactivity toward 18:2n-6 and 18:3n-3. FADS2 transfected cells showed activity towards both the substrates; gas chromatography-covalent adduct chemical ionization tandem mass spectrometry (GC-CACI-MS/MS) confirmed the new peaks to be 18:3n-6 and 18:4n-3 respectively (Figure 1). As expected, no products were observed when either 18:2n-6 or 18:3n-3 were incubated with the FADS1 and the empty vector controls. These data provide the first unambiguous molecular evidence that the metabolic defect in these cells can be restored by replacing the rate limiting  $\Delta$ 6-desaturase enzyme encoded by FADS2.

When FADS1-transfected cells were incubated with 20:2n-6 and 20:3n-3, CACI-MS/MS shows gain of synthetic function to generate two new butylene-interrupted PUFA peaks: 5,11,14-20:3 and 5,11,14,17-20:4, respectively (Figure 2). These two LCPUFA are analogues to arachidonic acid (5,8,11,14-20:4) and eicosapentaenoic acid (5,8,11,14,17-20:5), respectively. Our data demonstrate that in the substantial absence of  $\Delta$ 8-desaturase activity (FADS2), the  $\Delta$ 5-desaturase (FADS1) operates on 20:2n-6 and 20:3n-3.  $\Delta$ 6-desaturation (FADS2) is normally about 10-fold more active than  $\Delta$ 5-desaturation (FADS1), thus it is plausible that during cell transformation FADS1 activity would persist when FADS2 is inactive. However, the preferred substrates for FADS1 are not essential fatty acids (18:2n-6 and 18:3n-3), but their elongation products 20:2n-6 and 20:3n-3. FADS1 acting on these substrates generates unusual butylene-interrupted carbon products and our results show that these rare fatty acids may be produced in cancer cells. This is the first molecular evidence showing novel FADS1 substrate specificity for 20:2n-6

and 20:3n-3 fatty acids. Moreover, FADS2-transfected cells demonstrate conclusively that the *FADS2* gene product  $\Delta$ 8-desaturates 20:2n-6 and 20:3n-3 to 20:3n-6 (DGLA) and 20:4n-3 (ETA) respectively, equivalent to our results in heterologously transformed yeast [14].

Moreover, while it is well known that both n-3 and n-6 PUFA substrates compete for same enzymes, our current data show FADS1 and FADS2 competing for the same substrates (Figure 2). The net consequence is the substitution of the inactive 5,11,14-20:3 and 5,11,14,17-20:4 for ARA (5,8,11,14-20:4) and EPA (5,8,11,14,17-20:5), respectively, with unpredictable consequences for eicosanoid-mediated cell-cell paracrine signaling. Dysregulation of eicosanoid signaling is linked to tumor development, angiogenesis and metastasis in animal models [15]. A double bond at position 8 is required for cyclooxygenase (COX), lipoxygenase (LOX) and thromboxane biosynthesis, and thus the absence of the double bond at position 8 renders 5,11,14-20:3 and 5,11,14,17-20:4 inactive as substrates for biosynthesis of most eicosanoids [16,17,18]. Moreover, the possible action of the butylene-interrupted PUFA as competitive inhibitors of eicosanoid biosynthetic enzymes is unknown, as is the activity of other key eicosanoid synthetic enzymes (e.g. cytochrome P450) whose actions on normal parts of the unusual fatty acids would result in products with unknown activity(ies).

FADS genes, encoding enzymes required for PUFA biosynthesis arose evolutionarily by gene duplication events. Despite key importance of FADS2 and the loss of its function in several cancer cells, the molecular details and consequences of FADS2 loss has not been described or investigated. FADS2 is known to have activity towards at least seven substrates (18:2n-6, 18:3n-3, 20:2n-6, 20:3n-3, 24:4n-6, 24:5n-3, 16:0). The loss of FADS2-encoded activities in cancer cells completely shuts down the classical and alternative PUFA pathways, eliminating eicosanoid and docosanoid precursor biosynthesis from the plant-based PUFA linoleic and linolenic acids and thus limiting cell-cell signaling (Figure 3). Many studies have found strong associations between single nucleotide polymorphisms within the FADS gene cluster and complex phenotypes related to chronic disease, as well

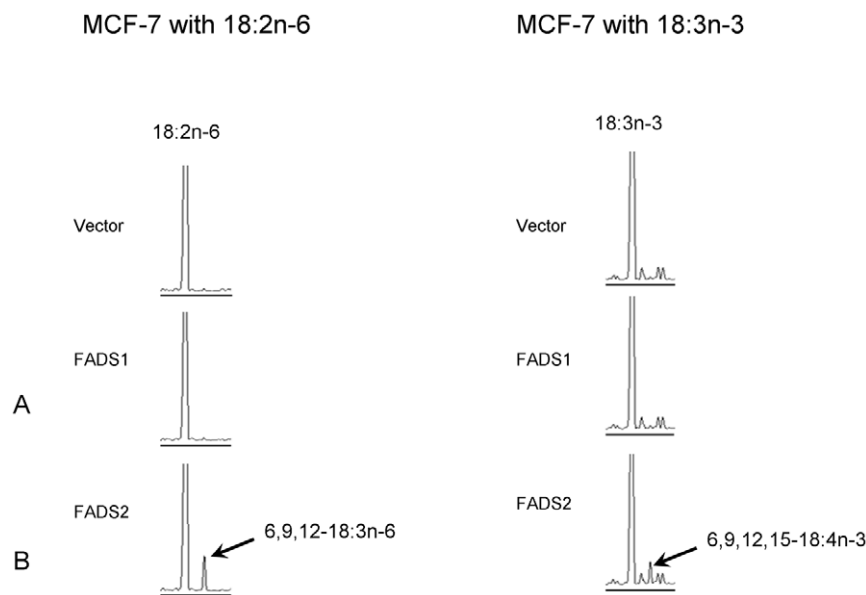

**Figure 1. GC results of transfected MCF7 cells with 18:2n-6 and 18:3n-3 fatty acids.** A: No product is seen in FADS1-transfected cells. B: FADS2 transfected cells  $\Delta$ 6-desaturate 18:2n-6  $\rightarrow$  18:3n-6 (9,12-18:2  $\rightarrow$  6,9,12-18:2) and 18:3n-3  $\rightarrow$  18:4n-3 (9,12,15-18:3  $\rightarrow$  6,9,12,15-18:4). doi:10.1371/journal.pone.0028186.g001

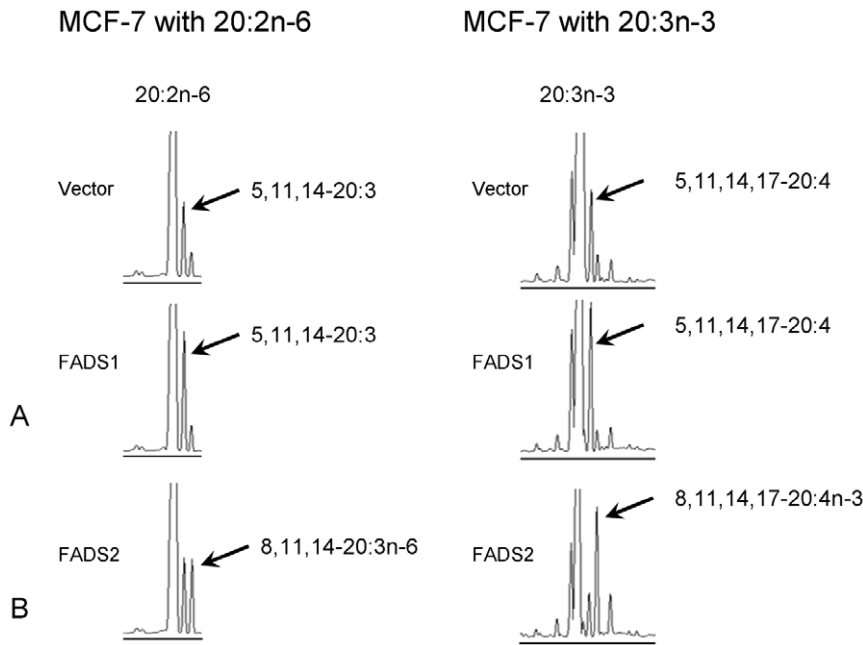

**Figure 2. GC results of FADS2 transfected MCF7 cells with 20:2n-6 (8,11-20:2) and 20:3n-3 (8,11,14-20:3) fatty acids.** A: FADS1-transfected cells  $\Delta 5$ -desaturate 20:2n-6  $\rightarrow$  5,11,14-20:3 and 20:3n-3  $\rightarrow$  5,11,14,17-20:4. B: FADS2 transfected cells  $\Delta 8$ -desaturate 20:2n-6  $\rightarrow$  20:3n-6 and 20:3n-3  $\rightarrow$  20:4n-3. doi:10.1371/journal.pone.0028186.g002

as to long chain PUFA levels [19,20]. Further studies are needed to fully understand the consequences of FADS gene function loss and/or modulation based on SNPs in neoplasm. Early studies demonstrated that micro-cell mediated transfer of HSA11 into MCF7 cells reduced tumorigenicity, suggestive of potential tumor suppressor genes on this chromosome [21].

Our findings show that a primary molecular defect in MCF7 cells lies within the FADS2 gene causing loss of FADS2-encoded  $\Delta 6$ -desaturase activity. Compensation for FADS2 function by FADS1 leads to the production of 5,11,14-20:3 and 5,11,14,17-20:4, both primarily dead-end fatty acid products that cannot be precursors for most eicosanoids and are likely to be competitive

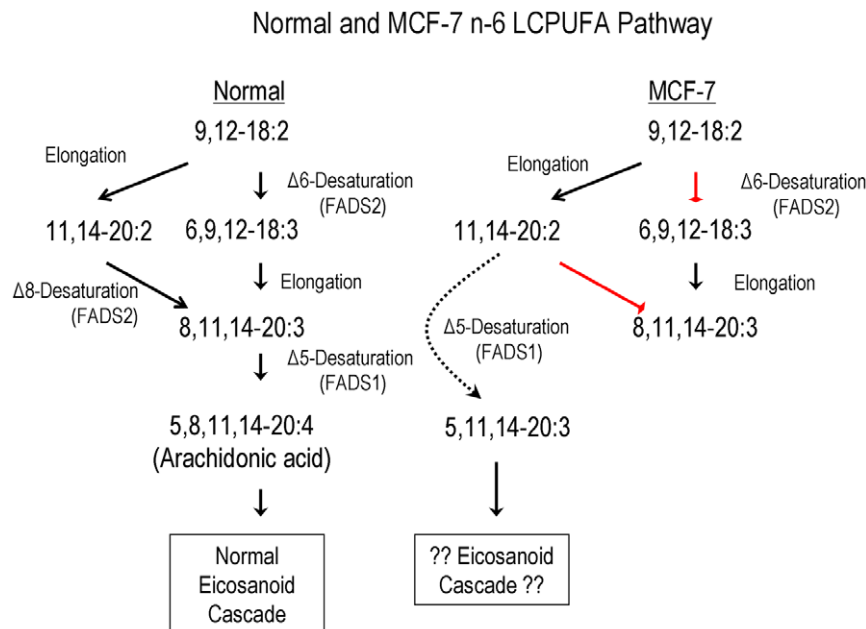

**Figure 3. n-6 LCPUFA pathway in MCF7 cells.**  $\Delta 6$ - and  $\Delta 8$ -desaturation steps are absent in MCF7, leading to  $\Delta 5$ -desaturation of 11,14-20:2 to 5,11,14-20:3 when FADS1 is functional. The analogous pathways for n-3 LCPUFA convert 11,14,17-20:3  $\rightarrow$  5,11,14,17-20:4 (not shown). FADS2 is also believed to be involved in C22 LCPUFA biosynthesis (not shown). doi:10.1371/journal.pone.0028186.g003

inhibitors. The physiological significance of butylene interrupted PUFA in cancer cells calls for further detailed investigation. Our present results provide an impetus to better understanding the role of fatty acid desaturases, especially FADS2 as a tumor suppressor in neoplastic disorders.

## Materials and Methods

### Plasmid vector construction

The protein coding sequences of FADS1 (GenBank Accession# EF531577) and FADS2 (GenBank Accession# EU780003) were cloned into pcDNA3.1 expression vector using cDNA from neonate baboon liver tissue. The cDNA was obtained from banked samples drawn from a study approved by the Cornell University Institutional Animal Care and Use Committee (IACUC, protocol # 02–105). Analysis and comparison of amino acid sequence of baboon FADS1 showed 95% identities and 97% positives with human FADS1 (AF084558), whereas, baboon FADS2 showed 98% identities and 99% positives with human FADS2 (NM\_004265). Earlier, we have shown novel  $\Delta 8$ -desaturation function using baboon FADS2 [14].

### MCF7 cell culture and fatty acid supplementation

For transfection experiments MCF7 cells were grown in MEM- $\alpha$  media with 10% Lipid-reduced FBS (media and serum obtained from HyClone) at 37°C in a humidified environment with 5% CO<sub>2</sub>. Human breast cancer MCF7 cells (American Type Culture

Collection, ATCC, Rockville, MD) were the kind gift of Dr. Rui Hai Liu, Cornell University. The FADS1 and FADS2 constructs were transfected into MCF7 cells using Lipofectamine LTX (Invitrogen, USA) as per the manufacturer's recommendations. Twenty four hours after transfection, the MCF7 cells were supplemented with 100  $\mu$ M of albumin bound 18:2n–6, 18:3n–3, 20:2n–6 and 20:3n–3 fatty acids and were incubated for additional 24 hours.

### Fatty acid analysis

After incubation with fatty acids, the cells were washed twice with 1XPBS and removed by trypsinization. The cells were harvested by centrifugation and the cell pellet was processed for lipid extraction. Fatty acid methyl ester preparation was carried out using a modified one-step method of Garces and Mancha [22]. Analysis was by gas chromatography-flame ionization detection (GC-FID) [8] and peak identification was confirmed by GC-covalent adduct chemical ionization tandem mass spectrometry (GC-CACI-MS/MS) [14,23].

### Author Contributions

Conceived and designed the experiments: JTB KSK WP. Performed the experiments: WP KSK PL. Analyzed the data: JTB KSK WP PL. Contributed reagents/materials/analysis tools: JTB KSK WP PL. Wrote the paper: JTB KSK WP.

## References

- Chandrasekharappa SC, Guru SC, Manickam P, Olufemi SE, Collins FS, et al. (1997) Positional cloning of the gene for multiple endocrine neoplasia-type 1. *Science* 276: 404–407.
- Chung CC, Ciampa J, Yeager M, Jacobs KB, Berndt SI, et al. (2011) Fine mapping of a region of chromosome 11q13 reveals multiple independent loci associated with risk of prostate cancer. *Hum Mol Genet*;doi: 10.1093/hmg/ddr189.
- Koreth J, Bakkenist CJ, McGee JO (1999) Chromosomes, 11Q and cancer: a review. *J Pathol* 187: 28–38.
- Rosa-Rosa JM, Pita G, Gonzalez-Neira A, Milne RL, Fernandez V, et al. (2009) A 7 Mb region within 11q13 may contain a high penetrance gene for breast cancer. *Breast Cancer Res Treat* 118: 151–159.
- Srivatsan ES, Chakrabarti R, Zainabadi K, Pack SD, Benyamini P, et al. (2002) Localization of deletion to a 300 Kb interval of chromosome 11q13 in cervical cancer. *Oncogene* 21: 5631–5642.
- Marquardt A, Stohr H, White K, Weber BH (2000) cDNA cloning, genomic structure, and chromosomal localization of three members of the human fatty acid desaturase family. *Genomics* 66: 175–183.
- Nakamura MT, Nara TY (2004) Structure, function, and dietary regulation of delta6, delta5, and delta9 desaturases. *Annu Rev Nutr* 24: 345–376.
- Diau GY, Hsieh AT, Sarkadi-Nagy EA, Wijendran V, Nathanielsz PW, et al. (2005) The influence of long chain polyunsaturate supplementation on docosahexaenoic acid and arachidonic acid in baboon neonate central nervous system. *BMC Med* 3: 11.
- Simopoulos AP (1999) Essential fatty acids in health and chronic disease. *Am J Clin Nutr* 70: 560S–569S.
- Serhan CN (2005) Novel eicosanoid and docosanoid mediators: resolvins, docosatrienes, and neuroprotectins. *Curr Opin Clin Nutr Metab Care* 8: 115–121.
- Mathers L, Bailey MJ (1975) Enzyme deletions and essential fatty acid metabolism in cultured cells. *J Biol Chem* 250: 1152–1153.
- Grammatikos SI, Subbaiah PV, Victor TA, Miller WM (1994) Diversity in the ability of cultured cells to elongate and desaturate essential (n-6 and n-3) fatty acids. *Ann N Y Acad Sci* 745: 92–105.
- Grammatikos SI, Subbaiah PV, Victor TA, Miller WM (1994) n-3 and n-6 fatty acid processing and growth effects in neoplastic and non-cancerous human mammary epithelial cell lines. *Br J Cancer* 70: 219–227.
- Park WJ, Kothapalli KS, Lawrence P, Tyburczy C, Brenna JT (2009) An alternate pathway to long-chain polyunsaturates: the FADS2 gene product Delta8-desaturates 20:2n-6 and 20:3n-3. *J Lipid Res* 50: 1195–1202.
- Marks F, Furstnberger G (2000) Cancer chemoprevention through interruption of multistage carcinogenesis. The lessons learnt by comparing mouse skin carcinogenesis and human large bowel cancer. *Eur J Cancer* 36: 314–329.
- Panigrahy D, Kaipainen A, Greene ER, Huang S (2010) Cytochrome P450-derived eicosanoids: the neglected pathway in cancer. *Cancer Metastasis Rev* 29: 723–735.
- Vane JR, Bakhle YS, Botting RM (1998) Cyclooxygenases 1 and 2. *Annu Rev Pharmacol Toxicol* 38: 97–120.
- Wei YF, Evans RW, Morrison AR, Sprecher H, Jakschik BA (1985) Double bond requirement for the 5-lipoxygenase pathway. *Prostaglandins* 29: 537–545.
- Lattka E, Illig T, Heinrich J, Koletzko B (2010) Do FADS genotypes enhance our knowledge about fatty acid related phenotypes? *Clin Nutr* 29: 277–287.
- Merino DM, Ma DW, Mutch DM (2010) Genetic variation in lipid desaturases and its impact on the development of human disease. *Lipids Health Dis* 9: 63.
- Negrini M, Sabbioni S, Possati L, Rattan S, Corallini A, et al. (1994) Suppression of tumorigenicity of breast cancer cells by microcell-mediated chromosome transfer: studies on chromosomes 6 and 11. *Cancer Res* 54: 1331–1336.
- Garces R, Mancha M (1993) One-step lipid extraction and fatty acid methyl esters preparation from fresh plant tissues. *Anal Biochem* 211: 139–143.
- Van Pelt CK, Brenna JT (1999) Acetonitrile chemical ionization tandem mass spectrometry to locate double bonds in polyunsaturated fatty acid methyl esters. *Anal Chem* 71: 1981–1989.
